# Supplementary material for: Copy number variation and microdeletions of the Y chromosome linked genes and loci across different categories of Indian infertile males
Source: PubMed Central journal article supplement (PMC4671023; doi:10.1038/srep17780), 2015-12-07
Supplement: srep17780-s1.pdf [file srep17780-s1.pdf]

**Copy number variation and microdeletions of the Y chromosome linked genes and loci across different categories of Indian infertile males**

Anju Kumari<sup>1</sup>, Sandeep Kumar Yadav<sup>1</sup>, M.M. Misro<sup>2</sup>, Jamal Ahmad<sup>3</sup>, Sher Ali<sup>1\*</sup>

<sup>1</sup>Molecular Genetics Laboratory, National Institute of Immunology, New Delhi-110067, India

<sup>2</sup>Department of Reproductive Biomedicine, National Institute of Health and Family Welfare, New Delhi-110067, India.

<sup>3</sup>Centre for Diabetes and Endocrinology, JN Medical College and Hospital, Aligarh Muslim University, Aligarh, Uttar Pradesh-202002, India

Author affiliations

**Corresponding author**

Dr. Sher Ali

Email: alisher@nii.ac.in; sheralib5@hotmail.com

Molecular Genetics Laboratory

National Institute of Immunology

New Delhi-110067, India

Ph. 91-011-26703753

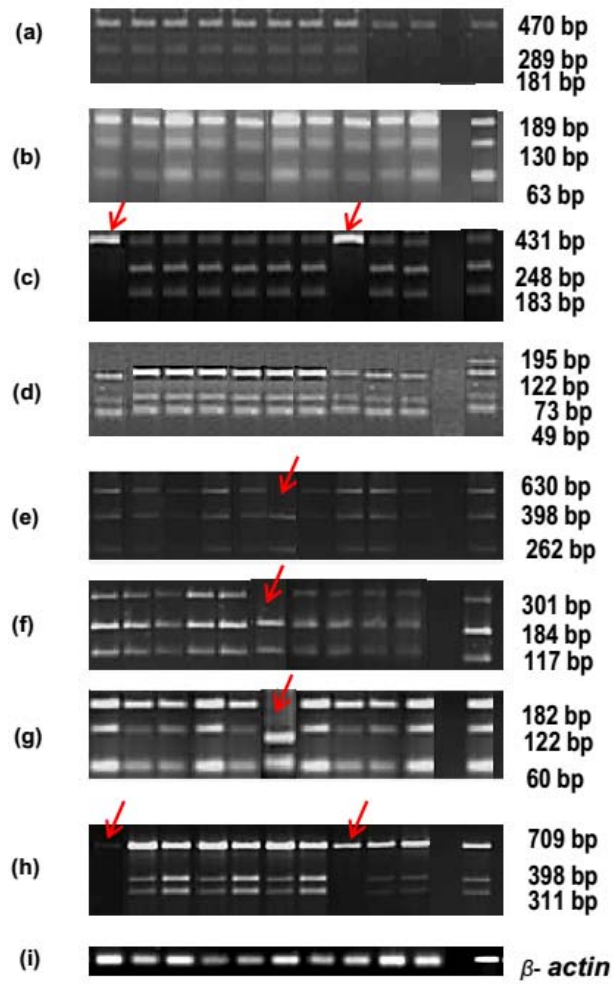

**Supplementary Fig. S1. SNV analysis of *DAZ* and *BPY2* genes.** (A) – (H) show representative gels for *BPY2\_SNV*, *DAZ* SNV\_I, II, III, IV, V, VI, VII and  $\beta$ -actin, respectively. The restriction digestion fragment sizes for the corresponding SNVs are shown on the right side.  $\beta$ -actin was used as an internal positive control.

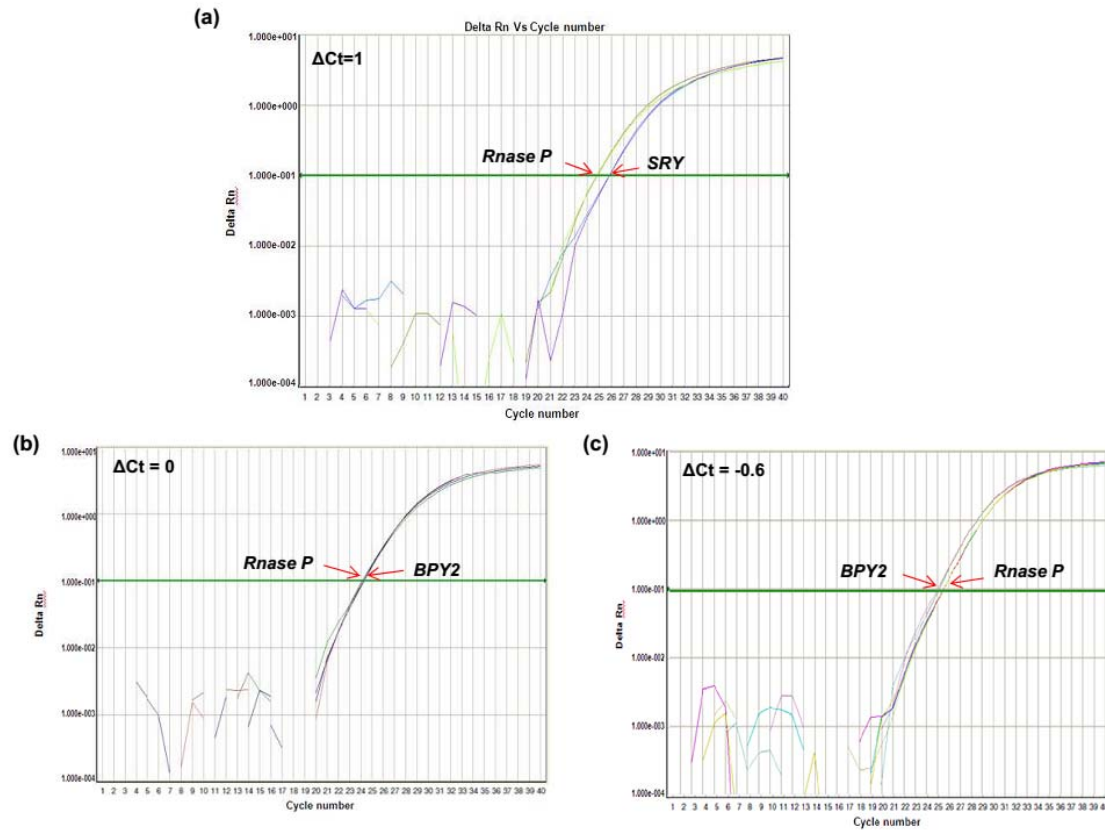

**Supplementary Fig.S2 . Amplification plots used for copy number calculation of *SRY* and *BPY2* genes. (A), (B) and (C) are the representative real time PCR amplification plots for copy number estimation of *SRY* and *BPY2* genes. *RNase P* was used as reference gene.  $\Delta Ct = 1$  represents one copy of *SRY* gene, similarly  $\Delta Ct = 0.6$  and  $\Delta Ct = 0$  correspond to three and two copies of the *BPY2* gene, respectively.**

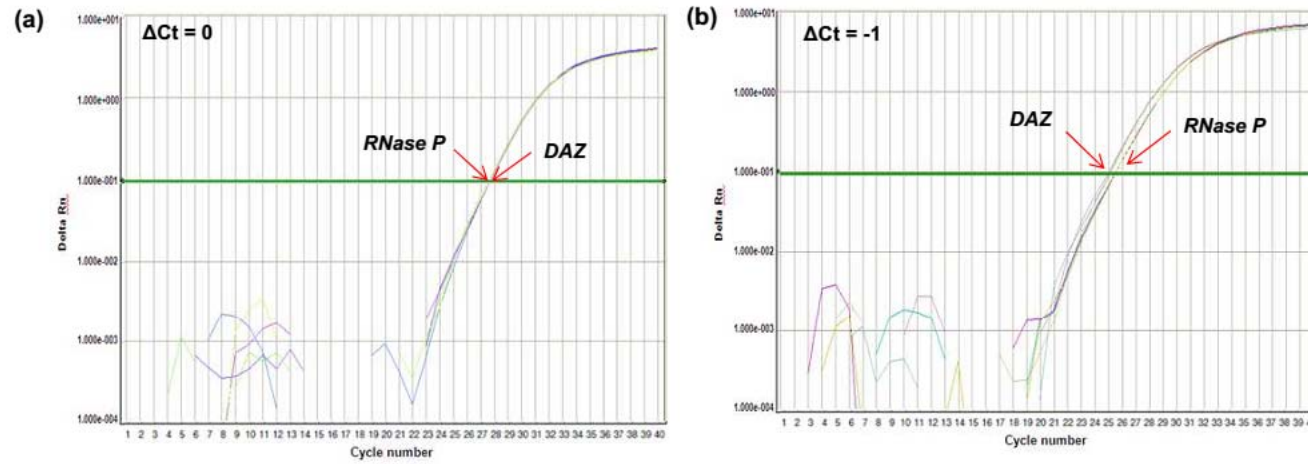

**Supplementary Fig.S3. Amplification plots used for copy number calculation of *DAZ* gene.** (A) and (B) are representative qPCR amplification plots for *DAZ* gene.  $\Delta Ct=0$  and  $\Delta Ct= -1$  correspond to two and four copies of the *DAZ* genes, respectively.

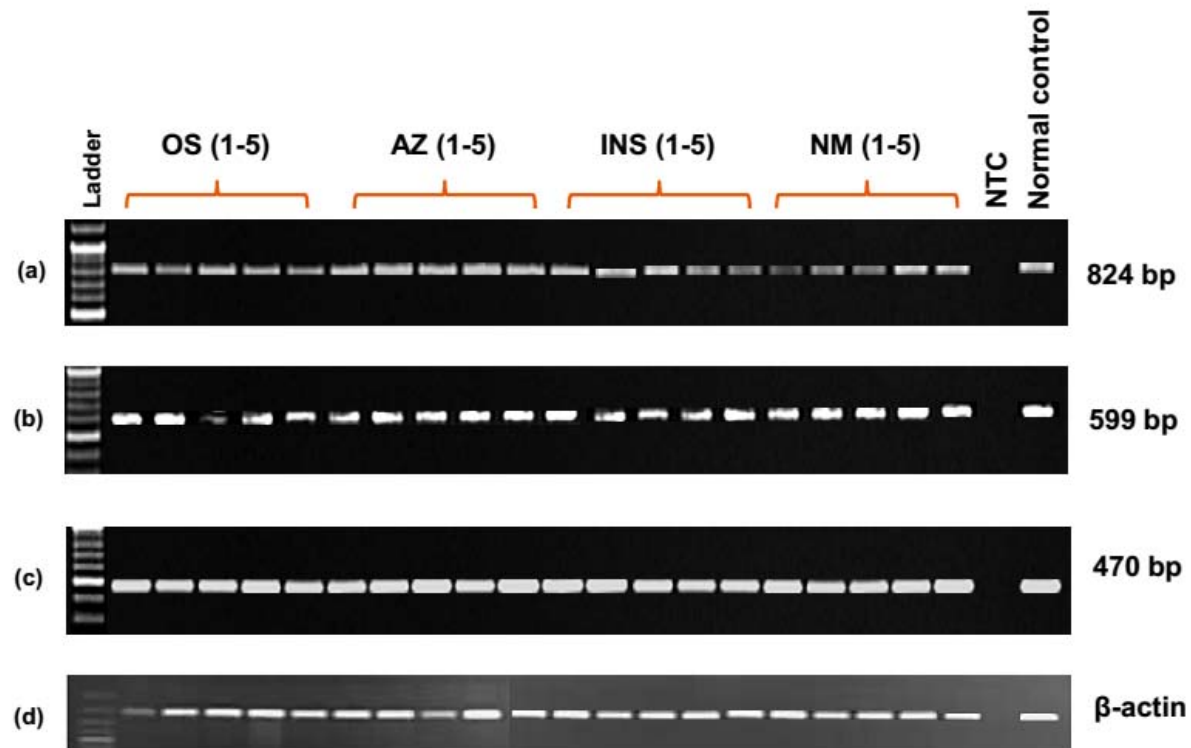

**Supplementary Fig. S4 . Intactness of *SRY* gene in germ line samples of patients.** The *SRY* gene was assessed for its intactness using primers SRY1 (A), SRY2 (B) and sY14 (C).  $\beta$ - actin was used as an internal positive control (D). The size of amplicons are shown along the right side. The patient IDs are shown on the top. NTC indicates the negative controls without template DNA. Sample of normal fertile male used as control are given on the right. Here, OS, AZ and INS denote oligospermic, azoospermic and infertile males with normal spermiogram, respectively.

**Supplementary Table S1 List of the STSs used for screening of the *AZF*a, *b* and *c* regions**

| S. No. | <i>AZF</i> region  | STSs used                                                                                                                                                                              |
|--------|--------------------|----------------------------------------------------------------------------------------------------------------------------------------------------------------------------------------|
| 1      | <i>AZF</i> a       | sY95, sY746, sY1064, sY1065, sY1066, sY1179, sY1180, sY1181, sY1182, sY1183, sY1184, sY1185, sY1186, sY123, sY1234, sY1251, sY1316, sY1317                                             |
| 2      | <i>AZF</i> b       | sY117, sY125, sY127, sY129, sY113, sY131, sY627                                                                                                                                        |
| 3      | <i>AZF</i> c       | sY121, sY142, sY254, sY255, sY278, sY277, sY1054, sY1125, sY1161, sY1190, sY1191, sY1197, sY1201, sY1206, sY1246, sY1258, sY1263, sY1291, sY1322, sY1682                               |
| 4      | Gene specific STSs | <i>DBY1</i> , <i>DBY2</i> , F19/E355, sY1035, sY1235, sY1233, sY1237, sY1260, sY1318, sY276, sY1238, sY1240, sY1250 and sY1319, <i>ZFY</i> , sY14, <i>RRM3</i> , <i>Y-DAZ3</i> , sY152 |

sY1235    sY1260    sY1237    sY121    sY1322    sY280    sY1233    sY1682    sY627    sY142    sY1258    sY1161    sY1197    sY1191    sY1035    sY1318    sY254    sY1291    sY1125    sY1054    sY1190    sY1263    sY1206    sY1201    sY1246

Deletion recombination

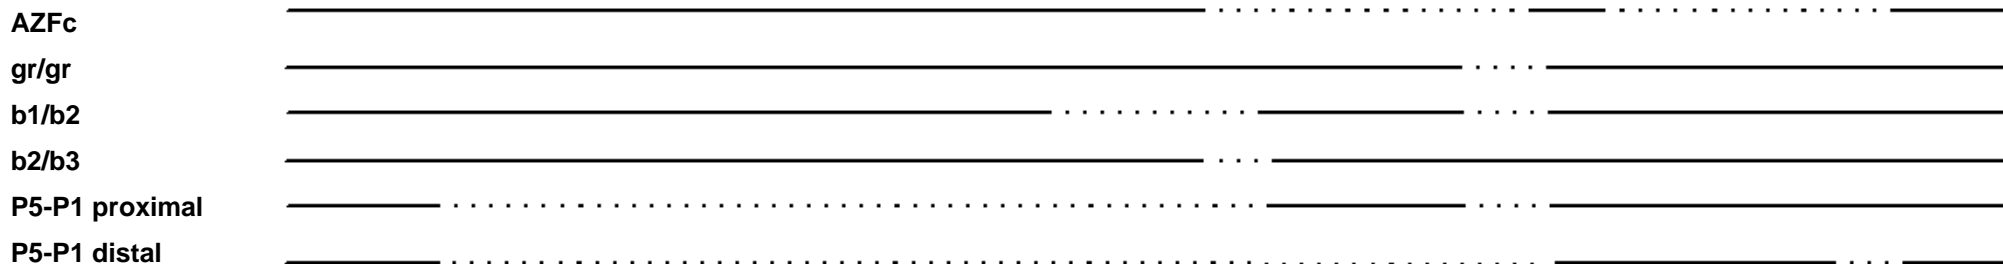

Supplementary table S2 Primers used for end point PCR

| Primer                          | Sequence                                                     |
|---------------------------------|--------------------------------------------------------------|
| <i><math>\beta</math>-actin</i> | F- AGATGACCCAGATCATGTTTGAGA<br>R-CTAAGTCATAGTCCGCCTAGAAGC    |
| <i>GAPDH</i>                    | F- GCCACATCGCTCAGACACCAT<br>R- ACCAGGCGCCCAATACG             |
| <i>SRY1</i>                     | F- GAATCTGGTAGAAGTGAGTTTTGGA<br>R- GCCTTTATTAGCCAGAGAAAAGAAA |
| <i>SRY2</i>                     | F- CTTCTGCTATGTTAAGCGTATTCAA<br>R- CAGCTTTGTCCAGTGGCTGTA     |
| <i>sY14</i>                     | F- GAATATTCCTCCGCTCTCCGGA<br>R- GCTGGTGCTCCATTCTTGAG         |

**Supplementary Table S3. Details of sizes of different STSs**

| <b>UniSTS</b> | <b>Size of STS (bp)</b> |
|---------------|-------------------------|
| sY95          | 303                     |
| sY746         | 216                     |
| sY1064        | 110                     |
| sY1065        | 239                     |
| sY1066        | 131                     |
| sY1179        | 207                     |
| sY1180        | 200                     |
| sY1181        | 263                     |
| sY1182        | 247                     |
| sY1183        | 201                     |
| sY1184        | 213                     |
| sY1185        | 190                     |
| sY1186        | 179                     |
| sY1231        | 292                     |
| sY1234        | 350                     |
| sY1251        | 422                     |
| sY1316        | 463                     |
| sY1317        | 487                     |
| sY113         | 304                     |
| sY117         | 502                     |
| sY125         | 470                     |
| sY127         | 386                     |
| sY129         | 205                     |
| sY131         | 143                     |
| sY627         | 104                     |
| sY121         | 190                     |
| sY142         | 196                     |
| sY254         | 380                     |
| sY255         | 123                     |
| sY277         | 275                     |
| sY1054        | 340                     |
| sY1125        | 283                     |
| sY1161        | 330                     |
| sY1188        | 666                     |



|        |     |
|--------|-----|
| sY1263 | 467 |
| sY1291 | 527 |
| sY1322 | 530 |
| sY1682 | 437 |
| DBY1   | 277 |
| DBY2   | 689 |
| sY1035 | 348 |
| sY1235 | 200 |
| sY1233 | 423 |
| sY1237 | 150 |
| sY1260 | 491 |
| sY1318 | 531 |
| sY276  | 216 |
| sY1238 | 375 |
| sY1240 | 385 |
| sY1250 | 493 |
| sY1319 | 303 |
| ZFY    | 358 |
| sY14   | 470 |
| RRM3   | 474 |
| Y-DAZ3 | 256 |
| sY152  | 125 |

**Supplementary Table S4** Details of SNVs analyzed for *DAZ* and *BPY2* genes

| Gene Target     | SNV                | Accession no.   | Product size (bp) | Restriction enzyme | Restriction site | Fragments Size (bp) | Alleles | Copies           |
|-----------------|--------------------|-----------------|-------------------|--------------------|------------------|---------------------|---------|------------------|
| <i>DAZ</i> gene | <i>DAZ</i> -SNV_I  | <i>G73167</i>   | 709               | <i>FspI</i>        | TGC/GCA          | 709<br>398+311      | A<br>B  | 1,2,3<br>4       |
|                 | <i>DAZ</i> -SNV_II | <i>G73166</i>   | 182               | <i>MboI</i>        | /GATC            | 182<br>122+60       | A<br>B  | 1<br>2,3,4       |
|                 | sY586              | <i>G63907</i>   | 301               | <i>TaqI</i>        | T/CGA            | 301<br>184+117      | A<br>B  | 2<br>1,3,4       |
|                 | <i>DAZ</i> -SNV_IV | <i>G73168</i>   | 630               | <i>AluI</i>        | AG/CT            | 630<br>398+262      | A<br>B  | 2<br>1,3,4       |
|                 | sY587              | <i>G63908</i>   | 244               | <i>DraI</i>        | TTT/AAA          | 195+49<br>122+73+49 | A<br>B  | 3,4<br>1,2       |
|                 | <i>DAZ</i> -SNV_VI | <i>G73169</i>   | 431               | <i>AflIII</i>      | A/CRYGT          | 431<br>248+183      | A<br>B  | 1,2,3<br>4       |
|                 | sY581              | <i>G63906</i>   | 252               | <i>Sau3AI</i>      | /GATC            | 189+63<br>130+63+59 | A<br>B  | 1,4<br>2,3       |
| <i>BPY2</i>     | <i>BPY2</i>        | <i>BV012732</i> | 470               | <i>EcoRV</i>       | GAT/ATC          | 470<br>289+181      | A<br>B  | 2 Copy<br>1 Copy |

## LEGENDS TO FIGURES

**Figure 1. Diagrammatic illustration showing analysis of the MSY region in the patients' samples.** (a) Represents human Y chromosome. HT indicate the heterochromatin region of Y chromosome; CEN, centromere and PAR, pseudoautosomal regions. (b) Regions on the Y chromosome where STS were analyzed. Sample IDs are given on the left. NFM represent normal fertile males; OS, oligospermic; AZ, Azoospermic and INS, Infertile males with normal spermiogram. Black solid lines relates to the samples indicating the presence of the STS analyzed, whereas the dotted lines represent deletion of the same.

**Figure 2. STS mapping of AZFa region of the patients.** STS mapping of *AZFa* region was done using samples from infertile males of different categories (oligospermic OS, azospermic AZ, infertile males with normal spermiogram INS) and normal fertile males (NFM). Presence of the corresponding STSs in the patients is indicated by solid line and absence by dotted lines; patient IDs and their categories are shown on the left. As expected, all the STSs were found to be intact in the fertile male samples used as control.

**Figure 3. STS mapping of AZFb and AZFc regions.** (a) Diagrammatic illustration of human Y chromosome. (b) Representative gels (i-viii) showing STS mapping of *AZFb* region for some patients. *β-actin* was used as an internal control. The STSs analyzed are shown on the right side and the patients IDs, in the bottom. NTC and PTC indicate the negative and positive controls, respectively. NFM, OS, AZ and INS indicate normal fertile males, oligospermic, azospermic and infertile males with normal spermiogram, respectively. (c) *AZFc* STS mapping results of some of the representative samples from each category of males. Presence of the corresponding STSs (given on the top) in the patients are indicated by solid line and absence by dotted ones. The patient IDs are shown on the left side.

**Figure 4. Deletion frequency in the AZF regions in the infertile males from different categories.** X-axis depicts the deletions in different regions of the Y chromosome, whereas the Y-axis shows % of the patients. Black bars indicate the % of males (belonging to particular category) with deletions and grey bars correspond to % of males without deletions. Panels a, b and c are for the OS, AZ and INS respectively. No deletions were observed in the normal fertile males.

**Figure 5. Copy number analysis of DYZ1 arrays by qPCR.** Representative amplification plot (a) and standard curve (b) used for the copy number calculation of DYZ1 arrays. The bar graphs (c-f) show the distribution of copies in the males of different categories including oligospermic (43), infertile males with normal spermiogram (40), azospermic (34) and normal fertile males (55) respectively. All the reactions were performed in triplicates and the results shown here are average of these triplicates.

**Figure 6. Localization of DYZ1 on metaphase chromosomes, interphase nuclei and spermatozoa using FISH.** (a) DYZ1 probe was labeled with Texas red, whereas metaphases and interphase nuclei were stained with DAPI. (b) Sperm nuclei are stained with DAPI. The Y bearing sperms are showing red signal of DYZ1, whereas the X bearing sperms lack the DYZ1 signal. (c) Male blood metaphase and (e) sperm samples were processed together with the experimental samples under identical conditions but not hybridized with the DYZ1 probe to exclude the background signal. (d) Female sample hybridized with DYZ1 probe. Patient IDs are shown in green. OS indicates oligospermic; AZ, azoospermic; INS, infertile males with normal spermiogram and NFM, normal fertile males.

**Figure 7. Copy number estimation of *SRY*, *BPY2* and *DAZ* genes using real time PCR.** (a-d) Summarizes the distribution of copy number of *SRY*, *BPY2* and *DAZ* in oligospermic (a), Azoospermic (b), infertile males with normal spermiogram (c) and normal fertile males (d), respectively. X-axis depicts the gene of interest analyzed and the copy number assessed using real time PCR while the Y-axis indicates the % of males with corresponding copies for the genes. Grey bars indicate the normal copy number for the particular gene and the white bars indicate the copy number variation observed. A total of 43 OS, 34 AZ and 40 INS patients were analyzed for copy numbers and each reaction was set in triplicates during real time PCR amplification.

**Figure 8. Chromosomal localization of *SRY* gene on metaphases, interphase nuclei and spermatozoa using Fluorescence *in situ* hybridization (FISH).** (a) The metaphase and interphase nuclei are stained with DAPI. The *SRY* gene localized on the Y chromosome is showing red signal and X-centromere, fluorescent green signal. (b) Figure represents mapping of *SRY* gene on the individual sperm. All the Y bearing sperms are shown in red, whereas those of X-bearing ones are shown in green. (c) Male blood metaphase and (e) sperm samples were processed under identical conditions but not hybridized with the *SRY* probe to exclude the background signal. (d) Female sample hybridized with *SRY* probe. The spermatozoa are stained with DAPI. Patient IDs are shown in yellow. AZ indicates azoospermic; OS, oligospermic; INS, infertile males with normal spermiogram and NFM, normal fertile male.
